# Supplementary material
Source: MDPI journal article supplement (https://www.mdpi.com/2311-7524/9/4/500)
Supplement: s1 [file s1]

**Table S1.** Primers used in qRT-PCR.

| Gene ID           | Gene Name  | Forward primer(5'-3')<br>Reverse primer(5'-3')                 |
|-------------------|------------|----------------------------------------------------------------|
| CsaV3_4G006480.1  | WRKY41     | 5'-CCGATAAGCAAGAACAGAAGGAA-3'<br>5'-GAGCCAAAGCAGAAGGTAGATG-3'  |
| CsaV3_2G034220.1  | CML38      | 5'-GAGACGGTGGTAGAGAAATTG-3'<br>5'-CTCTTCCTCTCCAACCTCCTTC-3'    |
| CsaV3_4G003420.1  | Ca3        | 5'-CAGAATCACCAAGAAGGAACTAAG-3'<br>5'-GCTCACCGAACTCATCAATATC-3' |
| CsaV3_3G012190.1  | Ethylene14 | 5'-TAGAAGGCAAGGAGTACGGATA-3'<br>5'-CTGGTAAGCGGATATTCATTAGGA-3' |
| CsaV3_6G051810.1  | TIFY 5A    | 5'-GATGCTACAACAGTCGTCTCC-3'<br>5'-GCTTGAACCCTATGCTTTCTCTT-3'   |
| CsaV3_6G044570.1  | bHLH18     | 5'-AATCTGACGATGCCTCTACCA-3'<br>5'-TTCCAGACACTCTTGCTTCTAC-3'    |
| CsaV3_2G034810.1  | MAPK       | 5'-CCGACCCGATTTCTGCTCTGTATA-3'<br>5'-TAACTCACTCGCCGTCCATCTC-3' |
| CsaV3_5G012670.1  | Lignin POD | 5'-CTCAGGTTTGCTTGAAACAGAT-3'<br>5'-ACCAGTAAGAGGTTGGATGTC-3'    |
| CsaV3_7G031610.1  | 4CL        | 5'-CCTTCTTATCACACATCCTAAA-3'<br>5'-TTACTTCTTCCTCGCTTATTG-3'    |
| CsaV3_4G023880.1  | LOX2       | 5'-ACCTGACCTTCATTCCAATTCCAA-3'<br>5'-TTCGGTATCACTGAGCCAACTG-3' |
| CsaV3_3G032840.1  | CCR2       | 5'-TTAGTGCTGACCTTCTTGATT-3'<br>5'-TTGTTCCGATTATGGCTTGTT-3'     |
| CsaV3_6G039670.1  | PAL        | 5'-AGGTGGCTGCTATTGCTACTC-3'<br>5'-CTCTCCATAACCCAATCACTGCTA-3'  |
| CsaV3_UNG223560.1 | POD17      | 5'-TTCATCAGAGAACCTCGTAGTGTC-3'<br>5'-GCATCGTCGGCGTATCATCTA-3'  |
| CsaV3_6G001990.1  | PYL        | 5'-GGAGGAGACCACAGGTTGAATA-3'<br>5'-CACATCCACCACATACGACT-3'     |
| CsaV3_3G012390.1  | Ethylene2  | 5'-CCTAATTCGGCACTTGTTGTA-3'<br>5'-CGTAGCATTGGCATCCTAATC-3'     |

Abbreviations: WRKY 41, WRKY transcription factor 41; CML38, calcium-binding protein CML38; Ca3, calmodulin-like protein 3; Ethylene14, ethylene-responsive transcription factor 14; TIFY 5A, protein TIFY 5A; bHLH18, transcription factor bHLH18; MAPK, mitogen-activated protein kinase; Lignin POD, lignin-forming anionic peroxidase; 4CL, 4-coumarate-CoA ligase 2; LOX2, lipoxygenase 2; CCR2, cinnamoyl-CoA reductase 2; PAL, phenylalanine ammonia-lyase; POD17, peroxidase 17; PYL, abscisic acid receptor PYL4; Ethylene2, ethylene receptor 2.
